# Supplementary material for: Multimodality Imaging of Angiogenesis in a Rabbit Atherosclerotic Model by GEBP11 Peptide Targeted Nanoparticles
Source: PubMed Central journal article supplement — Theranostics. 2017 Oct 17;7(19):4791–804. doi: 10.7150/thno.20767 (PMC5706100; doi:10.7150/thno.20767), 2017-10-17
Supplement: thnov07p4791s1.pdf [file thnov07p4791s1.pdf]

*Supplementary Material*

**Multimodality Imaging of Angiogenesis in a Rabbit Atherosclerotic Model by GEBP11 Peptide Targeted Nanoparticles**

Tao Su<sup>1, 3\*</sup>, Ya-Bin Wang<sup>1\*</sup>, Dong Han<sup>1, 2\*</sup>, Jing Wang<sup>5</sup>, Shun Qi<sup>4</sup>, Lei Gao<sup>1</sup>, Ya-Hui Shao<sup>5</sup>, Hong-Yu Qiao<sup>2</sup>, Jiang-Wei Chen<sup>2</sup>, Shu-Hui Liang<sup>6</sup>, Yong-Zhan Nie<sup>6</sup>, Jia-Yi Li<sup>2</sup>, Feng Cao<sup>1#</sup>

<sup>1</sup> Department of Cardiology, Chinese PLA General Hospital, Beijing 100853, China

<sup>2</sup> Department of Cardiology, Xijing Hospital, Fourth Military Medical University, Xi'an 710032, China

<sup>3</sup> Department of Cardiology, the 94th Hospital of Chinese PLA, Nanchang 330000, China

<sup>4</sup> Department of Radiology, Xijing Hospital, Fourth Military Medical University, Xi'an 710032, China

<sup>5</sup> Department of Nuclear Medicine, Xijing Hospital, Fourth Military Medical University, Xi'an 710032, China

<sup>6</sup> Institute of Digestive Diseases, Xijing Hospital, Fourth Military Medical University, Xi'an 710032, China

\* These authors contributed equally to this work

**# Corresponding author:**

Feng Cao, M.D., Ph.D. FACC

Department of Cardiology, Chinese PLA General Hospital,  
28# Fuxing Road, Beijing 100853, China

Tel: +86-10-55499138

E-mail: [wind8828@gmail.com](mailto:wind8828@gmail.com) or [fengcao@fmmu.edu.cn](mailto:fengcao@fmmu.edu.cn) or [fengcao8828@163.com](mailto:fengcao8828@163.com)

**Journal:** Theranostics.

**Supplementary Material:** 1 figure.

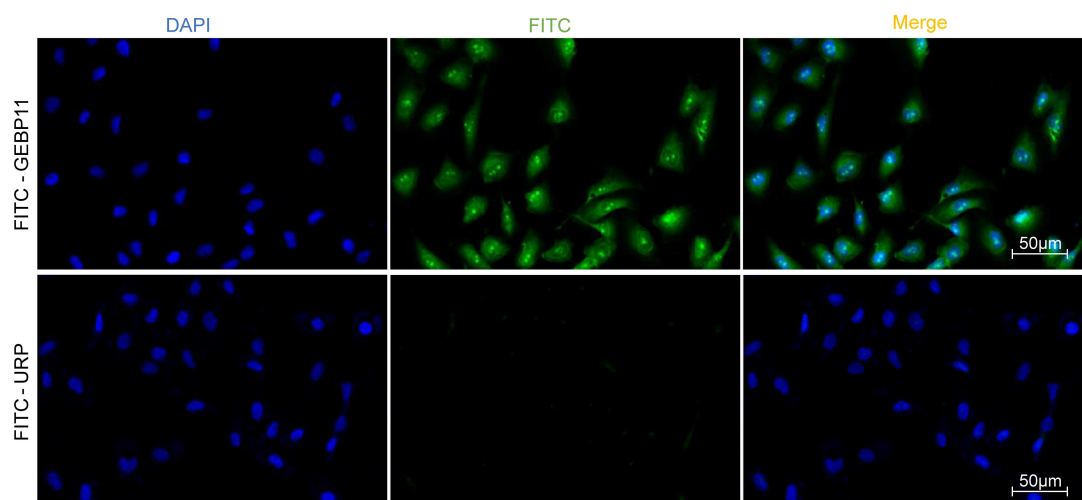

**Figure S1** The binding affinity of GEBP11 peptide and NGD-MNPs to EAhy926 cell. Immunofluorescence images of FITC-labeled GEBP11 peptide or un-related peptide (URP) incubated EAhy926 cell (the scale bar is 50  $\mu\text{m}$ ).
